# Supplementary material for: Breastfeeding and the Risk of Maternal Cardiovascular Disease: A Prospective Study of 300 000 Chinese Women
Source: PubMed Central journal article supplement (PMC5669201; doi:10.1161/jaha.117.006081), 2017-06-21

## **Supplemental Material**

**Table S1. Hazard ratios (95% confidence intervals) for cardiovascular disease associated with duration of breastfeeding among parous women who ever breastfed across different levels of adjustment**

|                              | N events | Duration of breastfeeding per child, months |                   |                   |                   |                   |
|------------------------------|----------|---------------------------------------------|-------------------|-------------------|-------------------|-------------------|
|                              |          | >0-6 months                                 | 6-12 months       | 12-18 months      | 18-24 months      | >24 months        |
| <b>Model 1</b>               |          |                                             |                   |                   |                   |                   |
| All cardiovascular disease   | 47301    | 1.00 (0.96; 1.04)                           | 0.98 (0.96; 1.00) | 0.97 (0.96; 0.99) | 0.95 (0.92; 0.97) | 0.91 (0.88; 0.94) |
| Major cardiovascular disease | 18348    | 1.00 (0.94; 1.07)                           | 1.00 (0.97; 1.03) | 1.00 (0.97; 1.02) | 0.99 (0.96; 1.03) | 0.94 (0.89; 0.98) |
| Fatal cardiovascular disease | 3695     | 1.00 (0.84; 1.20)                           | 0.96 (0.89; 1.03) | 0.99 (0.94; 1.06) | 0.95 (0.89; 1.02) | 0.99 (0.91; 1.09) |
| Coronary heart disease       | 15825    | 1.00 (0.94; 1.07)                           | 0.94 (0.91; 0.97) | 0.90 (0.88; 0.93) | 0.87 (0.83; 0.91) | 0.82 (0.78; 0.87) |
| Stroke                       | 22872    | 1.00 (0.94; 1.06)                           | 0.98 (0.96; 1.01) | 0.98 (0.95; 1.00) | 0.97 (0.93; 1.00) | 0.88 (0.84; 0.92) |
| Haemorrhagic stroke          | 2900     | 1.00 (0.82; 1.22)                           | 1.04 (0.96; 1.12) | 1.07 (1.00; 1.15) | 1.11 (1.02; 1.20) | 1.06 (0.95; 1.18) |
| Ischaemic stroke             | 13580    | 1.00 (0.93; 1.08)                           | 1.01 (0.97; 1.04) | 1.00 (0.97; 1.03) | 0.99 (0.95; 1.04) | 0.91 (0.86; 0.96) |
| <b>Model 2</b>               |          |                                             |                   |                   |                   |                   |
| All cardiovascular disease   | 47301    | 1.00 (0.96; 1.04)                           | 0.97 (0.96; 0.99) | 0.97 (0.96; 0.99) | 0.94 (0.92; 0.96) | 0.90 (0.87; 0.93) |
| Major cardiovascular disease | 18348    | 1.00 (0.94; 1.07)                           | 0.98 (0.95; 1.01) | 0.97 (0.94; 1.00) | 0.96 (0.93; 0.99) | 0.90 (0.86; 0.95) |
| Fatal cardiovascular disease | 3695     | 1.00 (0.84; 1.20)                           | 0.89 (0.83; 0.96) | 0.92 (0.87; 0.98) | 0.87 (0.81; 0.94) | 0.89 (0.82; 0.98) |
| Coronary heart disease       | 15825    | 1.00 (0.94; 1.07)                           | 0.94 (0.91; 0.97) | 0.92 (0.89; 0.94) | 0.89 (0.85; 0.92) | 0.84 (0.79; 0.89) |
| Stroke                       | 22872    | 1.00 (0.94; 1.06)                           | 0.97 (0.95; 1.00) | 0.97 (0.95; 0.99) | 0.96 (0.93; 0.99) | 0.87 (0.83; 0.92) |
| Haemorrhagic stroke          | 2900     | 1.00 (0.82; 1.22)                           | 1.02 (0.94; 1.10) | 1.05 (0.98; 1.12) | 1.08 (0.99; 1.17) | 1.02 (0.91; 1.14) |
| Ischaemic stroke             | 13580    | 1.00 (0.93; 1.08)                           | 0.99 (0.96; 1.03) | 0.99 (0.96; 1.02) | 0.98 (0.94; 1.02) | 0.89 (0.84; 0.94) |

**Model 3**

|                              |       |                   |                   |                   |                   |                   |
|------------------------------|-------|-------------------|-------------------|-------------------|-------------------|-------------------|
| All cardiovascular disease   | 47301 | 1.00 (0.96; 1.04) | 0.97 (0.95; 0.99) | 0.95 (0.94; 0.97) | 0.93 (0.90; 0.95) | 0.88 (0.85; 0.92) |
| Major cardiovascular disease | 18348 | 1.00 (0.94; 1.07) | 0.96 (0.93; 0.99) | 0.95 (0.92; 0.97) | 0.94 (0.91; 0.97) | 0.88 (0.84; 0.92) |
| Fatal cardiovascular disease | 3695  | 1.00 (0.84; 1.20) | 0.88 (0.82; 0.95) | 0.91 (0.86; 0.97) | 0.86 (0.80; 0.92) | 0.88 (0.80; 0.96) |
| Coronary heart disease       | 15825 | 1.00 (0.94; 1.07) | 0.93 (0.90; 0.96) | 0.89 (0.87; 0.92) | 0.87 (0.84; 0.91) | 0.82 (0.78; 0.87) |
| Stroke                       | 22872 | 1.00 (0.94; 1.06) | 0.96 (0.94; 0.98) | 0.95 (0.92; 0.97) | 0.94 (0.91; 0.97) | 0.85 (0.81; 0.89) |
| Haemorrhagic stroke          | 2900  | 1.00 (0.82; 1.22) | 0.99 (0.92; 1.07) | 1.02 (0.95; 1.09) | 1.04 (0.96; 1.13) | 0.97 (0.87; 1.08) |
| Ischaemic stroke             | 13580 | 1.00 (0.93; 1.08) | 0.97 (0.94; 1.00) | 0.96 (0.93; 0.99) | 0.95 (0.91; 0.99) | 0.86 (0.81; 0.91) |

**Model 4**

|                              |       |                   |                   |                   |                   |                   |
|------------------------------|-------|-------------------|-------------------|-------------------|-------------------|-------------------|
| All cardiovascular disease   | 47301 | 1.00 (0.96; 1.04) | 0.96 (0.95; 0.98) | 0.95 (0.93; 0.96) | 0.92 (0.89; 0.94) | 0.88 (0.85; 0.91) |
| Major cardiovascular disease | 18348 | 1.00 (0.93; 1.07) | 0.96 (0.93; 0.99) | 0.94 (0.92; 0.97) | 0.94 (0.90; 0.97) | 0.88 (0.83; 0.92) |
| Fatal cardiovascular disease | 3695  | 1.00 (0.84; 1.20) | 0.88 (0.82; 0.94) | 0.90 (0.85; 0.96) | 0.85 (0.80; 0.91) | 0.87 (0.79; 0.95) |
| Coronary heart disease       | 15825 | 1.00 (0.94; 1.07) | 0.93 (0.90; 0.95) | 0.89 (0.86; 0.91) | 0.86 (0.83; 0.90) | 0.81 (0.77; 0.86) |
| Stroke                       | 22872 | 1.00 (0.94; 1.06) | 0.96 (0.93; 0.98) | 0.94 (0.92; 0.97) | 0.93 (0.90; 0.96) | 0.84 (0.80; 0.88) |
| Haemorrhagic stroke          | 2900  | 1.00 (0.82; 1.22) | 0.99 (0.91; 1.07) | 1.01 (0.94; 1.08) | 1.03 (0.95; 1.12) | 0.96 (0.86; 1.07) |
| Ischaemic stroke             | 13580 | 1.00 (0.93; 1.08) | 0.97 (0.94; 1.00) | 0.96 (0.93; 0.99) | 0.94 (0.91; 0.99) | 0.86 (0.81; 0.91) |

---

Model 1: stratified by age at risk and study area; Model 2: Model 1 + adjustment for level of attained education, household income, smoking status, and alcohol use; Model 3: Model 2 + adjustment for systolic blood pressure, history of hypertension, physical activity, body mass index, and history of diabetes. Model 4 + adjustment for age at menarche, age at first birth, and total number of miscarriages, induced abortions, and stillbirths.

**Table S2. Hazard ratios (95% confidence intervals) for cardiovascular disease associated with duration of breastfeeding per child among parous women across different levels of adjustment, using those who never breastfed as the reference group**

|                              | N events | Duration of breastfeeding per child, months |                   |                   |                   |                   |                   |
|------------------------------|----------|---------------------------------------------|-------------------|-------------------|-------------------|-------------------|-------------------|
|                              |          | Never                                       | >0-6 months       | 6-12 months       | 12-18 months      | 18-24 months      | >24 months        |
| <b>Model 1</b>               |          |                                             |                   |                   |                   |                   |                   |
| All cardiovascular disease   | 48692    | 1.00 (0.95; 1.06)                           | 0.99 (0.95; 1.03) | 0.97 (0.95; 0.99) | 0.96 (0.95; 0.98) | 0.93 (0.91; 0.96) | 0.90 (0.87; 0.93) |
| Major cardiovascular disease | 18923    | 1.00 (0.92; 1.09)                           | 0.90 (0.85; 0.97) | 0.91 (0.88; 0.93) | 0.90 (0.88; 0.93) | 0.90 (0.86; 0.93) | 0.85 (0.81; 0.89) |
| Fatal cardiovascular disease | 3755     | 1.00 (0.77; 1.29)                           | 1.00 (0.84; 1.20) | 0.96 (0.90; 1.03) | 1.00 (0.94; 1.06) | 0.95 (0.89; 1.02) | 1.00 (0.91; 1.09) |
| Coronary heart disease       | 16401    | 1.00 (0.92; 1.09)                           | 0.97 (0.91; 1.04) | 0.91 (0.89; 0.94) | 0.88 (0.85; 0.91) | 0.85 (0.81; 0.88) | 0.80 (0.76; 0.85) |
| Stroke                       | 23631    | 1.00 (0.93; 1.08)                           | 0.95 (0.90; 1.00) | 0.93 (0.91; 0.96) | 0.93 (0.90; 0.95) | 0.92 (0.89; 0.95) | 0.84 (0.80; 0.88) |
| Haemorrhagic stroke          | 2956     | 1.00 (0.77; 1.31)                           | 0.84 (0.69; 1.02) | 0.87 (0.81; 0.94) | 0.90 (0.84; 0.97) | 0.93 (0.86; 1.01) | 0.89 (0.79; 0.99) |
| Ischaemic stroke             | 14066    | 1.00 (0.91; 1.10)                           | 0.89 (0.83; 0.96) | 0.90 (0.87; 0.93) | 0.89 (0.86; 0.92) | 0.88 (0.85; 0.92) | 0.81 (0.76; 0.85) |
| <b>Model 2</b>               |          |                                             |                   |                   |                   |                   |                   |
| All cardiovascular disease   | 48692    | 1.00 (0.95; 1.06)                           | 0.99 (0.95; 1.03) | 0.97 (0.95; 0.98) | 0.96 (0.95; 0.98) | 0.93 (0.91; 0.96) | 0.89 (0.86; 0.93) |
| Major cardiovascular disease | 18923    | 1.00 (0.92; 1.09)                           | 0.91 (0.85; 0.97) | 0.90 (0.87; 0.92) | 0.89 (0.86; 0.91) | 0.88 (0.85; 0.91) | 0.83 (0.79; 0.87) |
| Fatal cardiovascular disease | 3755     | 1.00 (0.77; 1.29)                           | 1.00 (0.84; 1.20) | 0.89 (0.83; 0.95) | 0.92 (0.86; 0.97) | 0.87 (0.81; 0.93) | 0.88 (0.80; 0.96) |
| Coronary heart disease       | 16401    | 1.00 (0.92; 1.09)                           | 0.98 (0.92; 1.05) | 0.92 (0.90; 0.95) | 0.90 (0.87; 0.93) | 0.87 (0.84; 0.91) | 0.82 (0.78; 0.87) |
| Stroke                       | 23631    | 1.00 (0.93; 1.08)                           | 0.97 (0.91; 1.02) | 0.93 (0.90; 0.95) | 0.92 (0.89; 0.94) | 0.91 (0.88; 0.94) | 0.82 (0.78; 0.86) |
| Haemorrhagic stroke          | 2956     | 1.00 (0.77; 1.31)                           | 0.84 (0.69; 1.02) | 0.85 (0.79; 0.92) | 0.87 (0.81; 0.93) | 0.89 (0.82; 0.97) | 0.84 (0.76; 0.94) |
| Ischaemic stroke             | 14066    | 1.00 (0.91; 1.10)                           | 0.90 (0.83; 0.96) | 0.89 (0.86; 0.92) | 0.88 (0.85; 0.91) | 0.87 (0.83; 0.91) | 0.79 (0.75; 0.84) |
| <b>Model 3</b>               |          |                                             |                   |                   |                   |                   |                   |
| All cardiovascular disease   | 48692    | 1.00 (0.95; 1.06)                           | 1.00 (0.96; 1.04) | 0.97 (0.96; 0.99) | 0.96 (0.94; 0.97) | 0.93 (0.91; 0.95) | 0.89 (0.86; 0.92) |
| Major cardiovascular disease | 18923    | 1.00 (0.92; 1.09)                           | 0.93 (0.87; 0.99) | 0.89 (0.87; 0.92) | 0.88 (0.85; 0.90) | 0.87 (0.84; 0.90) | 0.81 (0.78; 0.85) |
| Fatal cardiovascular disease | 3755     | 1.00 (0.77; 1.29)                           | 1.01 (0.84; 1.20) | 0.90 (0.84; 0.96) | 0.91 (0.85; 0.96) | 0.85 (0.80; 0.92) | 0.89 (0.81; 0.97) |
| Coronary heart disease       | 16401    | 1.00 (0.92; 1.09)                           | 0.99 (0.93; 1.06) | 0.93 (0.90; 0.96) | 0.89 (0.86; 0.92) | 0.87 (0.83; 0.90) | 0.82 (0.77; 0.87) |
| Stroke                       | 23631    | 1.00 (0.93; 1.08)                           | 0.95 (0.90; 1.01) | 0.93 (0.90; 0.95) | 0.92 (0.90; 0.94) | 0.91 (0.88; 0.94) | 0.83 (0.79; 0.87) |
| Haemorrhagic stroke          | 2956     | 1.00 (0.76; 1.31)                           | 0.84 (0.69; 1.03) | 0.84 (0.78; 0.90) | 0.86 (0.80; 0.92) | 0.88 (0.81; 0.95) | 0.82 (0.73; 0.91) |
| Ischaemic stroke             | 14066    | 1.00 (0.91; 1.10)                           | 0.92 (0.85; 0.99) | 0.89 (0.86; 0.92) | 0.88 (0.85; 0.91) | 0.87 (0.83; 0.90) | 0.78 (0.74; 0.83) |

Adjustment as in Table S1

**Table S3. Adjusted\* hazard ratios (95% confidence intervals) for cardiovascular disease associated with total lifetime duration of breastfeeding among parous women**

|                              | N events | Lifetime duration of breastfeeding, months |                   |                   |                   |                   |                   |
|------------------------------|----------|--------------------------------------------|-------------------|-------------------|-------------------|-------------------|-------------------|
|                              |          | Never                                      | >0-12 months      | 12-24 months      | 24-36 months      | 36-48 months      | >48 months        |
| All cardiovascular disease   | 48692    | 1.00 (0.95; 1.06)                          | 0.96 (0.93; 0.99) | 0.97 (0.95; 0.99) | 0.96 (0.94; 0.98) | 0.92 (0.89; 0.94) | 0.91 (0.88; 0.93) |
| Major cardiovascular disease | 18923    | 1.00 (0.92; 1.09)                          | 0.90 (0.86; 0.95) | 0.91 (0.87; 0.94) | 0.87 (0.84; 0.90) | 0.80 (0.77; 0.83) | 0.82 (0.78; 0.85) |
| Fatal cardiovascular disease | 3755     | 1.00 (0.77; 1.29)                          | 0.88 (0.74; 1.04) | 0.98 (0.87; 1.09) | 0.93 (0.85; 1.02) | 0.81 (0.74; 0.89) | 0.86 (0.79; 0.92) |
| Coronary heart disease       | 16401    | 1.00 (0.92; 1.09)                          | 0.93 (0.89; 0.99) | 0.92 (0.89; 0.96) | 0.86 (0.83; 0.89) | 0.86 (0.82; 0.90) | 0.82 (0.79; 0.86) |
| Stroke                       | 23631    | 1.00 (0.93; 1.08)                          | 0.93 (0.89; 0.97) | 0.93 (0.90; 0.96) | 0.91 (0.88; 0.94) | 0.86 (0.82; 0.89) | 0.85 (0.82; 0.89) |
| Haemorrhagic stroke          | 2956     | 1.00 (0.76; 1.31)                          | 0.84 (0.72; 0.99) | 0.87 (0.78; 0.97) | 0.81 (0.74; 0.89) | 0.78 (0.70; 0.86) | 0.84 (0.77; 0.93) |
| Ischaemic stroke             | 14066    | 1.00 (0.91; 1.10)                          | 0.91 (0.85; 0.96) | 0.89 (0.85; 0.93) | 0.86 (0.83; 0.90) | 0.80 (0.76; 0.84) | 0.81 (0.77; 0.85) |

\*Analyses are stratified by age at risk and study area, and adjusted for level of attained education, household income, smoking status, alcohol use, systolic blood pressure, history of hypertension, physical activity, body mass index, history of diabetes, and number of livebirths.

**Table S4. Adjusted\* hazard ratios (95% confidence intervals) for cardiovascular disease associated with duration of breastfeeding among women with one livebirth, using those who never breastfed as the reference group**

|                              | N events | Ever vs. never    | Lifetime duration of breastfeeding, months |                   |                   |                   |                   |                   |
|------------------------------|----------|-------------------|--------------------------------------------|-------------------|-------------------|-------------------|-------------------|-------------------|
|                              |          |                   | Never                                      | >0-6 months       | 6-12 months       | 12-18 months      | 18-24 months      | >24 months        |
| All cardiovascular disease   | 10760    | 0.95 (0.88; 1.01) | 1.00 (0.95; 1.06)                          | 0.96 (0.93; 0.99) | 0.97 (0.95; 0.99) | 0.96 (0.94; 0.98) | 0.92 (0.89; 0.94) | 0.91 (0.88; 0.93) |
| Major cardiovascular disease | 3274     | 0.89 (0.80; 1.00) | 1.00 (0.92; 1.09)                          | 0.90 (0.86; 0.95) | 0.91 (0.87; 0.94) | 0.87 (0.84; 0.90) | 0.80 (0.77; 0.83) | 0.82 (0.78; 0.85) |
| Fatal cardiovascular disease | 303      | 0.94 (0.62; 1.45) | 1.00 (0.77; 1.29)                          | 0.88 (0.74; 1.04) | 0.98 (0.87; 1.09) | 0.93 (0.85; 1.02) | 0.81 (0.74; 0.89) | 0.86 (0.79; 0.92) |
| Coronary heart disease       | 3597     | 0.89 (0.80; 0.99) | 1.00 (0.92; 1.09)                          | 0.93 (0.89; 0.99) | 0.92 (0.89; 0.96) | 0.86 (0.83; 0.89) | 0.86 (0.82; 0.90) | 0.82 (0.79; 0.86) |
| Stroke                       | 4676     | 0.93 (0.84; 1.02) | 1.00 (0.93; 1.08)                          | 0.93 (0.89; 0.97) | 0.93 (0.90; 0.96) | 0.91 (0.88; 0.94) | 0.86 (0.82; 0.89) | 0.85 (0.82; 0.89) |
| Haemorrhagic stroke          | 350      | 0.92 (0.62; 1.37) | 1.00 (0.76; 1.31)                          | 0.84 (0.72; 0.99) | 0.87 (0.78; 0.97) | 0.81 (0.74; 0.89) | 0.78 (0.70; 0.86) | 0.84 (0.77; 0.93) |
| Ischaemic stroke             | 2689     | 0.90 (0.80; 1.02) | 1.00 (0.91; 1.10)                          | 0.91 (0.85; 0.96) | 0.89 (0.85; 0.93) | 0.86 (0.83; 0.90) | 0.80 (0.76; 0.84) | 0.81 (0.77; 0.85) |

\*Analyses are stratified by age at risk and study area, and adjusted for level of attained education, household income, smoking status, alcohol use, systolic blood pressure, history of hypertension, physical activity, body mass index, and history of diabetes.

## Supplemental Figure Legends:

**Figure S1: Adjusted\* hazard ratios and 95% CIs for incident cardiovascular disease, coronary heart disease, and stroke associated with duration of breastfeeding per child among parous women who ever breastfed, by region.**\*Analyses are stratified by age at risk and study area, and adjusted for level of attained education, household income, smoking status, alcohol use, systolic blood pressure, history of hypertension, physical activity, body mass index, and history of diabetes. The hazard ratios (HRs) are plotted on a floating absolute scale. Each square has an area inversely proportional to the standard error of the log risk. Vertical lines indicate the corresponding 95% confidence intervals (CIs).

**Figure S2. Adjusted\* hazard ratios and 95% CIs for incident cardiovascular disease, coronary heart disease, and stroke associated with duration of breastfeeding per child among parous women who ever breastfed, by birth cohort.**\*Analyses are stratified by age at risk and study area, and adjusted for level of attained education, household income, smoking status, alcohol use, systolic blood pressure, history of hypertension, physical activity, body mass index, and history of diabetes. The hazard ratios (HRs) are plotted on a floating absolute scale. Each square has an area inversely proportional to the standard error of the log risk. Vertical lines indicate the corresponding 95% confidence intervals (CIs).

**Figure S1. Adjusted\* hazard ratios for incident CVD, CHD, and stroke associated with duration of breastfeeding per child among parous women who ever breastfed, by region**

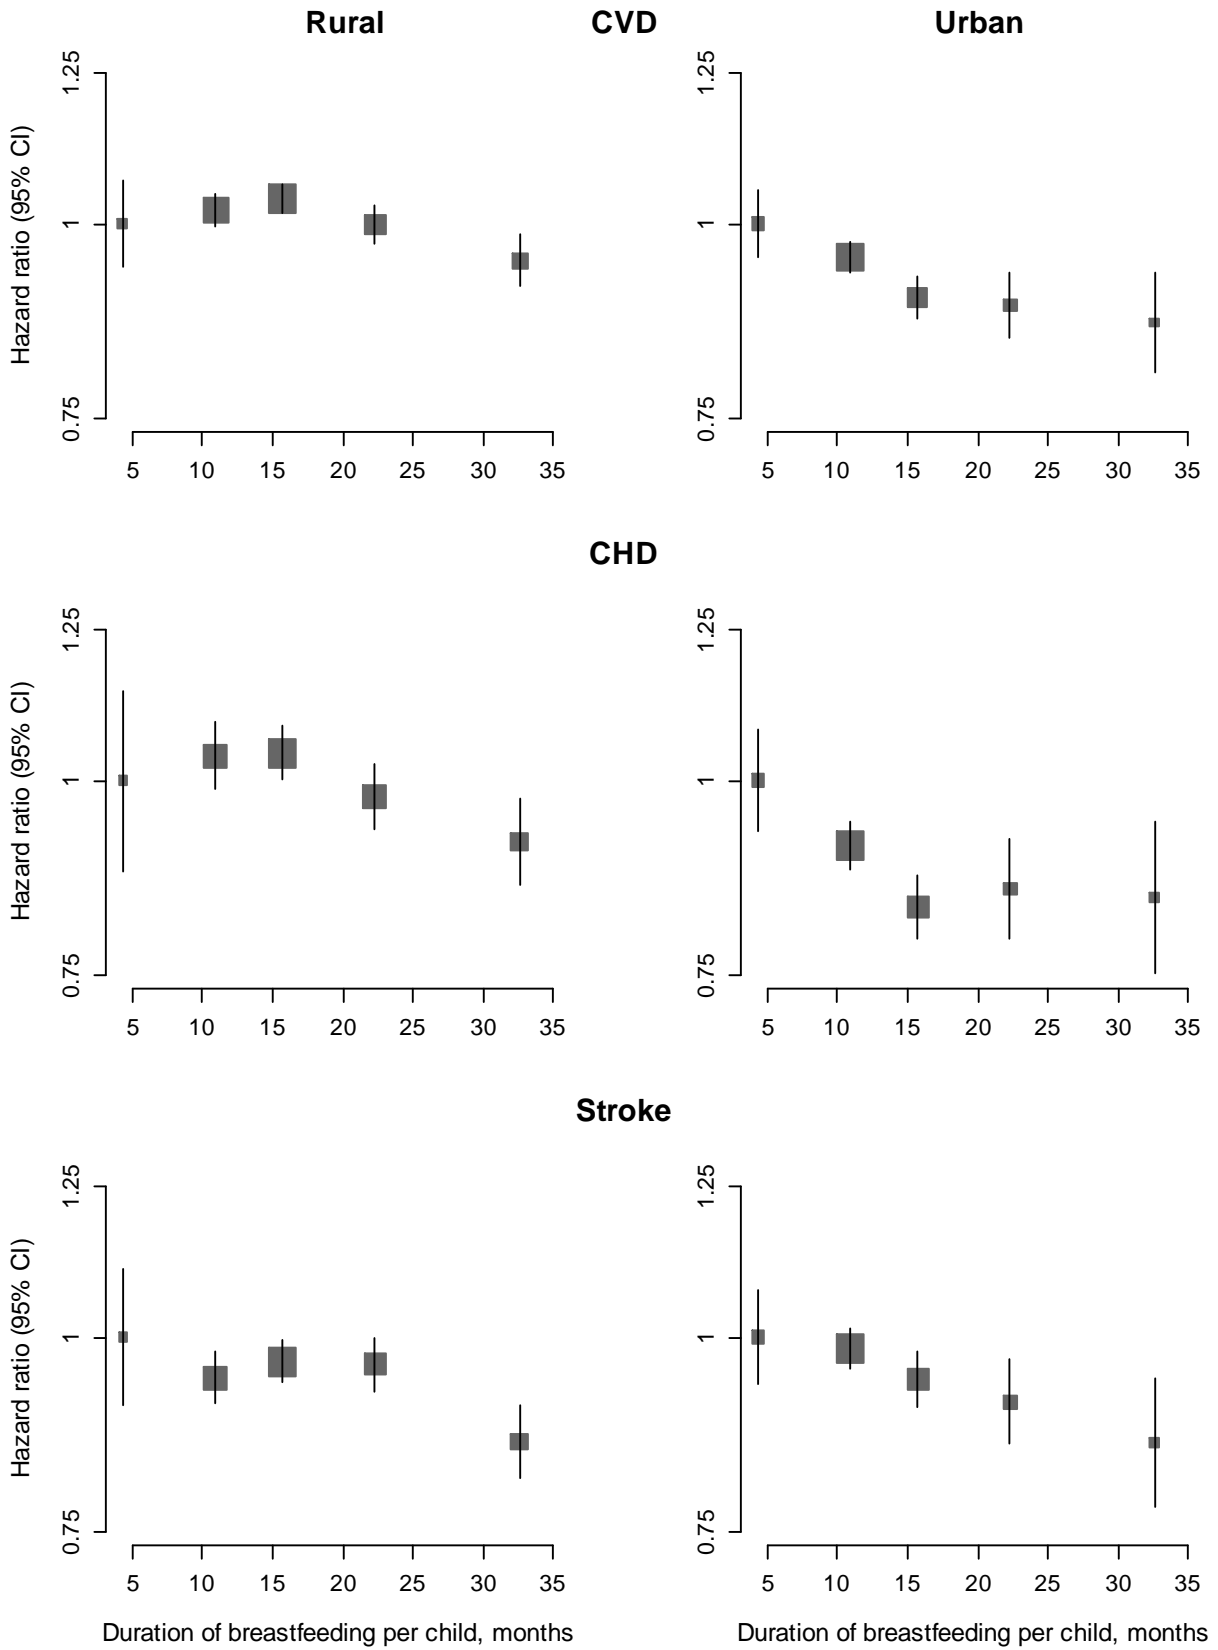



**Figure S2. Adjusted\* hazard ratios for incident CVD, CHD and stroke associated with duration of breastfeeding per child among parous women who ever breastfed, by birth cohort**

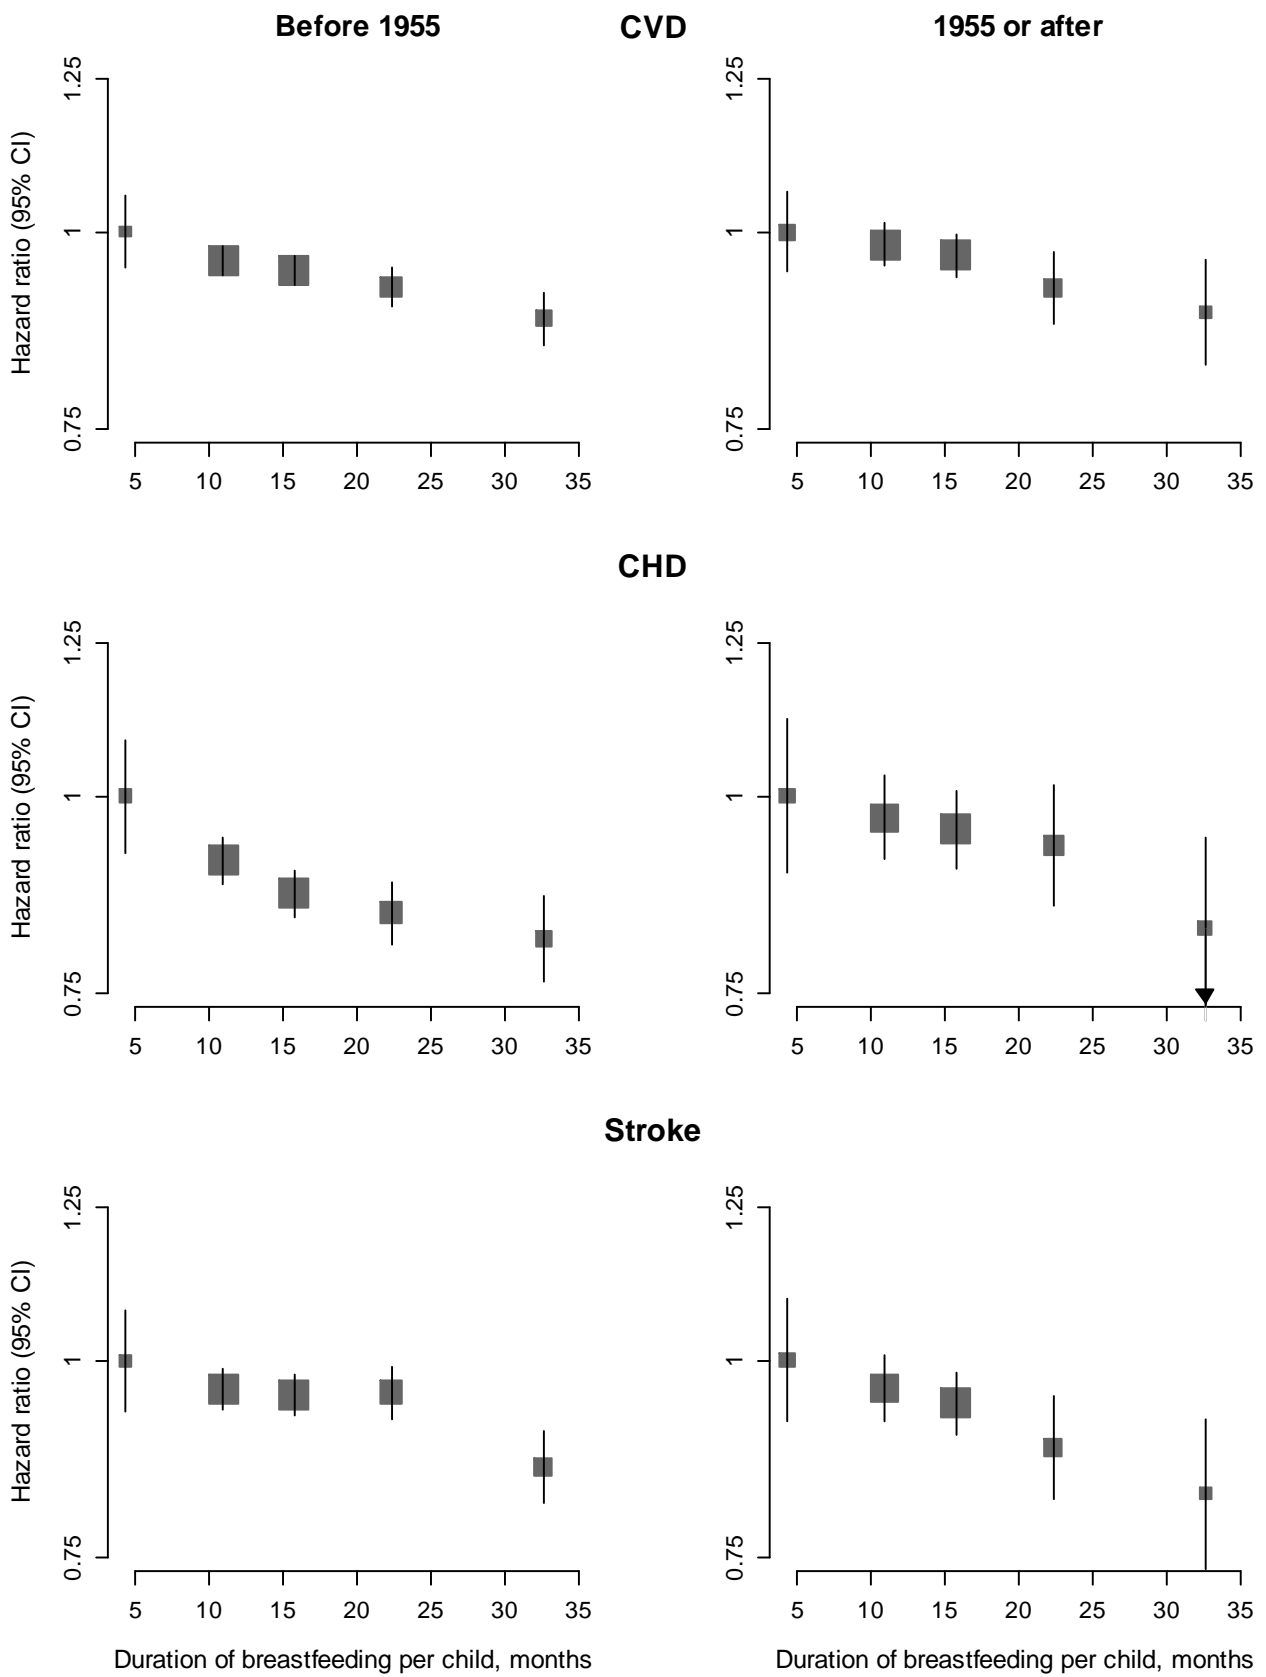

Supplement: JAH3-6-e006081-s001.pdf [file JAH3-6-e006081-s001.pdf]
